# Supplementary material for: COVID-19 related multisystem inflammatory syndrome in children (MIS-C): a hospital-based prospective cohort study from Kerala, India
Source: PubMed Central journal article supplement — BMJ Paediatr Open. 2021 Oct 17;5(1):e001195. doi: 10.1136/bmjpo-2021-001195 (PMC8523964; doi:10.1136/bmjpo-2021-001195), 2021-10-17
Supplement: bmjpo-2021-001195supp001.pdf [file bmjpo-2021-001195supp001.pdf]

**Supplementary Table 1: Demographic and baseline characteristics\***

|                                         | Total<br>(n=41) | < 5 years<br>(n=18) | 5-12 years<br>(n= 19) | >12- 20 years<br>(n=4) |
|-----------------------------------------|-----------------|---------------------|-----------------------|------------------------|
| Males – no.(%)                          | 23 (56)         | 9 (50)              | 11 (58)               | 3 (75)                 |
| Body habitus – no.(%)**                 |                 |                     |                       |                        |
| - Underweight                           | 3 (7)           | 1 (6)               | 2 (11)                | 0 (0)                  |
| - Normal weight                         | 34 (83)         | 17 (94)             | 15 (79)               | 2 (50)                 |
| - Overweight                            | 1 (2)           | 0 (0)               | 0 (0)                 | 1 (25)                 |
| - Obese                                 | 3 (7)           | 0 (0)               | 2 (11)                | 1 (25)                 |
| Presence of comorbidities-<br>no. (%)   |                 |                     |                       |                        |
| - Any                                   | 8 (20)          | 2 (11)              | 3 (16)                | 1 (25)                 |
| - Obesity or overweight                 | 4 (10)          | 0 (0)               | 1 (5) <sup>¶</sup>    | 1 (25)                 |
| - Cardiovascular disorders <sup>†</sup> | 1 (2)           | 0 (0)               | 1 (5)                 | 0 (0)                  |
| - CNS disorders <sup>§</sup>            | 3 (7)           | 2 (11)              | 1 (5)                 | 0 (0)                  |
| - Chronic lung disease <sup>‡</sup>     | 1 (2)           | 0 (0)               | 1 (5)                 | 0 (0)                  |

\*Percentages may not total 100 because of rounding. BMI = Body Mass Index, CNS = Central Nervous System

\*\* BMI based overweight and obesity were defined using Indian standard reference for BMI and it was calculated in age groups >5 years of age. For the cases under 5 years of age, overweight was defined as weight-for-height greater than 2 standard deviations above WHO Child Growth Standards median; and obesity was defined as weight-for-height greater than 3 standard deviations above the WHO child growth standards median. Underweight was defined in terms of weight for age using the WHO child growth standards for children below 5 years of age and using IAP WHO combined BMI growth charts for older children.

† One patient had large atrial and ventricular septal defects which were closed surgically.

§ Among 3 patients with CNS disorders, two had a seizure disorder, and one had hydrocephalus requiring surgical intervention.

¶ One patient of seizure disorder was obese as well.

‡ One patient had bronchial asthma controlled on inhaled steroids and long-acting beta-agonists.

**Supplementary table 2: Cardiac outcomes in 6 weeks follow up (n=39) §**

|                                        | Total<br>(n= 39)<br>no. (%) <sup>*</sup> | < 5 years<br>(n=17)<br>no. (%) <sup>*</sup> | 5-12 years<br>(n= 19)<br>no. (%) <sup>*</sup> | >12 years<br>(n=3)<br>no. (%) <sup>*</sup> |
|----------------------------------------|------------------------------------------|---------------------------------------------|-----------------------------------------------|--------------------------------------------|
| Any abnormality on clinical assessment | 0 (0)                                    | 0 (0)                                       | 0 (0)                                         | 0 (0)                                      |
| Abnormal coronaries                    | 8(21)                                    | 4(24)                                       | 4(21)                                         | 0 (0)                                      |
| Hyperechoic/ non-tapering coronaries   | 5(13)                                    | 3(18)                                       | 2(11)                                         | 0 (0)                                      |
| Dilatation                             | 2(5)                                     | 1(6)                                        | 1(5)                                          | 0 (0)                                      |
| Small Aneurysm                         | 1(3)                                     | 0 (0)                                       | 1(5)                                          | 0 (0)                                      |
| LV dysfunction                         | 1(3)                                     | 1(6)                                        | 0 (0)                                         | 0 (0)                                      |
| PAH                                    | 1(3)                                     | 0(0)                                        | 1(5)                                          | 0 (0)                                      |

§ Two patients had expired during the acute phase of MISC.

\* Percentages may not total 100 because of rounding.

**Supplementary figures:**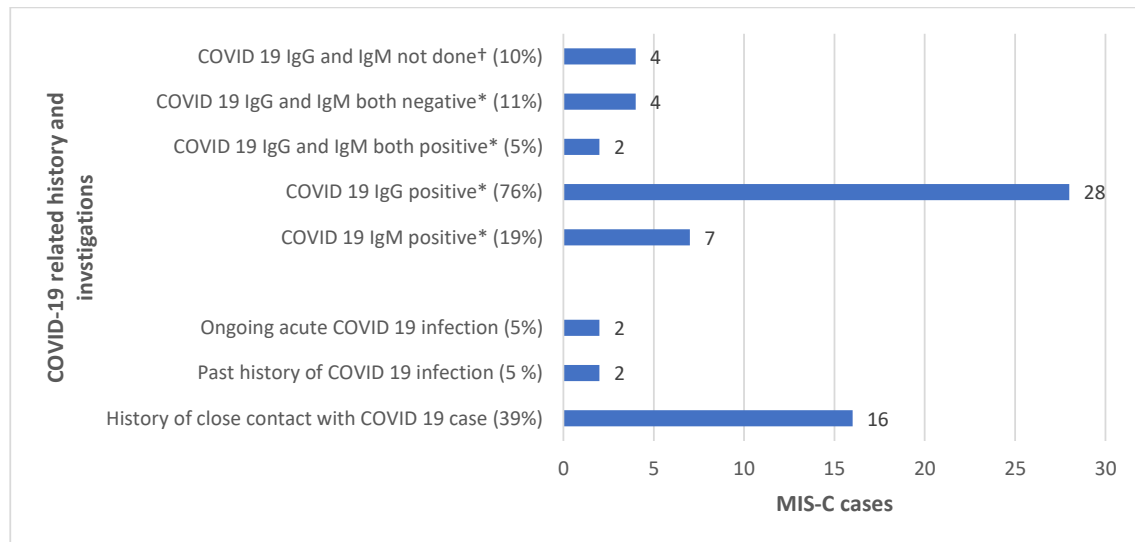**Supplementary figure 1: COVID 19 related history and investigations**

† These cases were diagnosed before September 2020 when the COVID antibodies were available at our centers.

\* Investigations are not mutually exclusive.

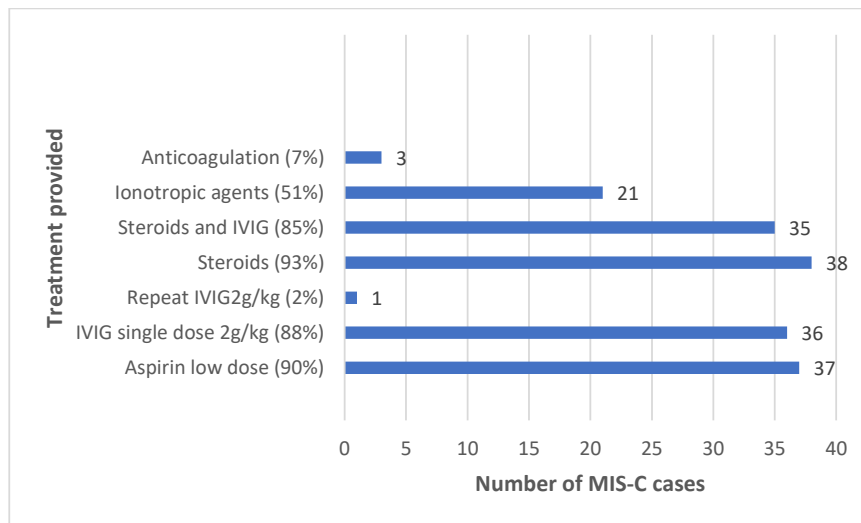

**Supplementary figure 2: Treatment provided to MIS-C cases**

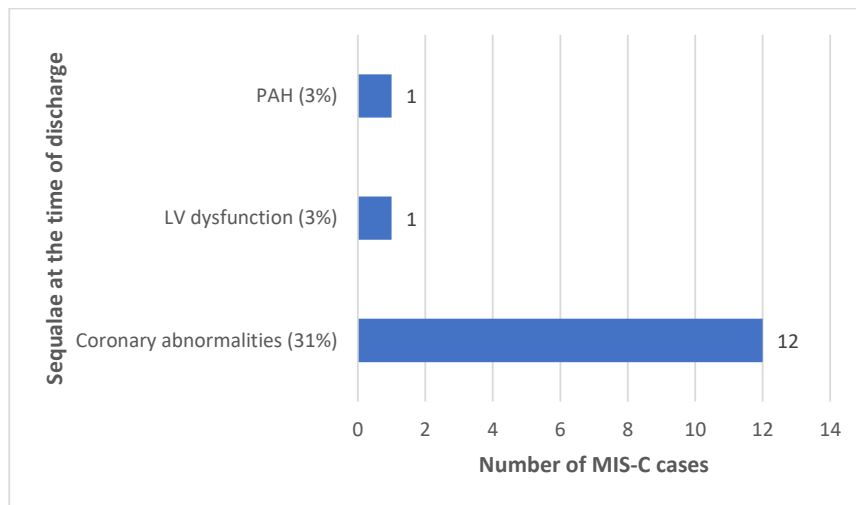

**Supplementary figure 3: Sequelae at the time of discharge (n =39)**
